# Supplementary material
Source: Springer Nature journal article supplement (https://www.springermedizin.de/resource/supplementary/12865_2014_581_MOESM12_ESM.pdf/9428282)
Supplement: MOESM12 [file 9428282]

*Lactobacillus jensenii* TL2937

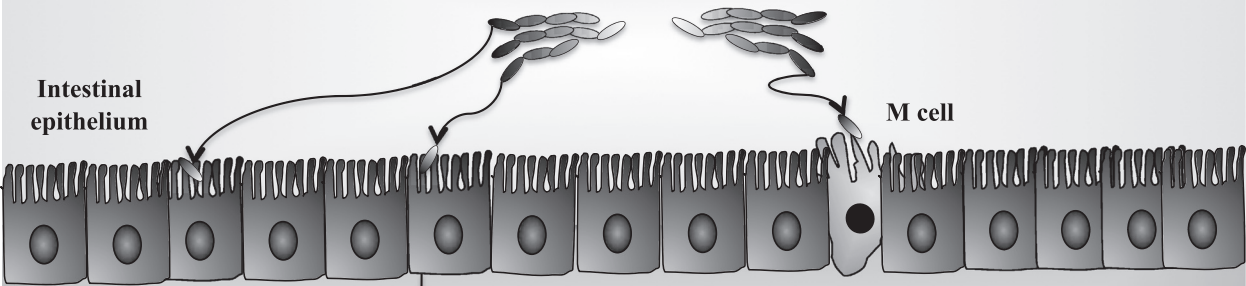

↑ TGF- $\beta$

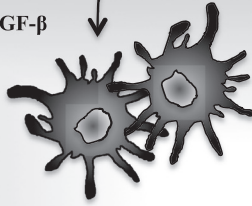

PIE CELLS

- ↑ IL-1 $\beta$
- ↑ MKP-1
- ↑ A20
- ↑ Bcl-3

CD172a+ CELLS

- ↑ IL-10
- ↑ Bcl-3

CD172a+ CELLS

- ↑ TGF- $\beta$
- ↑ IL-10
- ↑ SIGIRR
- ↑ IRAK-M
- ↑ A20

CD172a-CD11R1<sup>low</sup> CELLS

- ↑ IFN- $\gamma$

ETEC or LPS CHALLENGE

- ↓ IL-6
- ↓ IL-8
- ↓ MCP-1

- ↑ IL-10
- ↑ TGF- $\beta$
- ↓ IL-6

- ↑ TGF- $\beta$
- ↑ IL-10
- ↓ TNF- $\alpha$
- ↓ IL-6

- ↑ IFN- $\gamma$
- ↑ IL-1 $\beta$

PROTECTION AGAINST INFLAMMATORY DAMAGE

IMPROVEMENT OF IMMUNITY

INCREMENT OF PIGLETS PRODUCTIVITY
